# Supplementary material for: A viability-linked metagenomic analysis of cleanroom environments: eukarya, prokaryotes, and viruses
Source: PubMed Central journal article supplement (PMC4672508; doi:10.1186/s40168-015-0129-y), 2015-12-08

# 1A

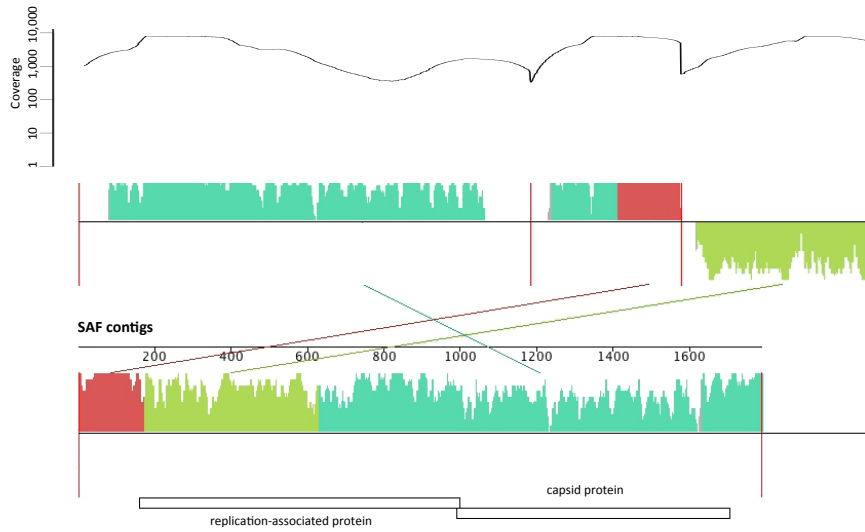

Human cyclovirus 7078A

# 2A

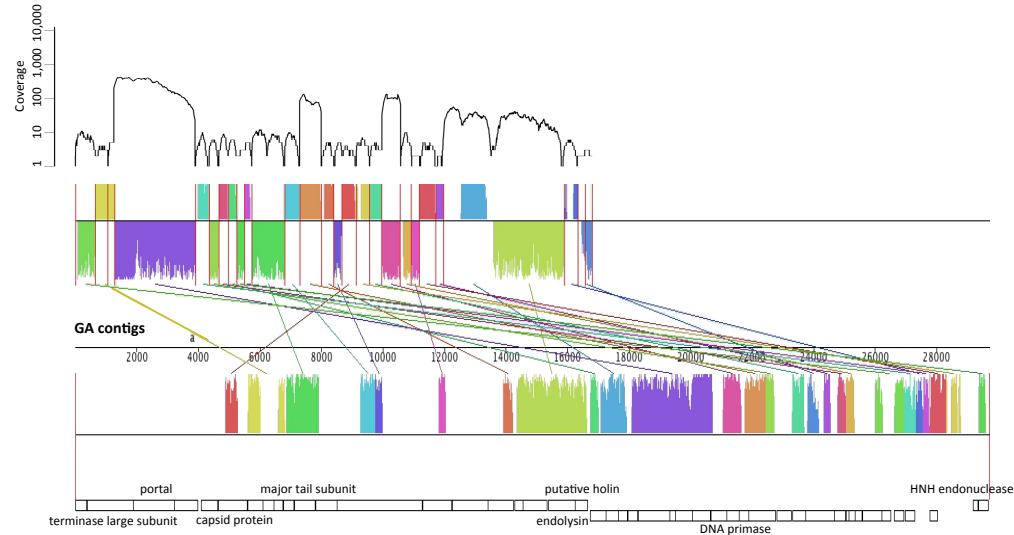

Propionibacterium phage P14.4

# 1B

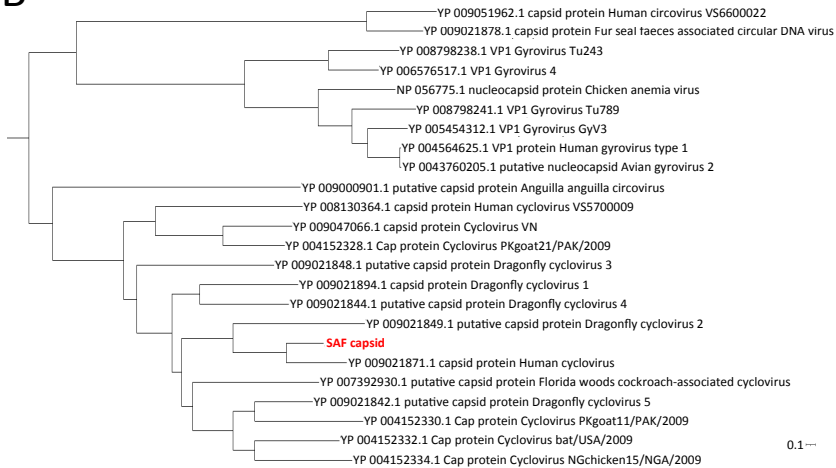

# 2B

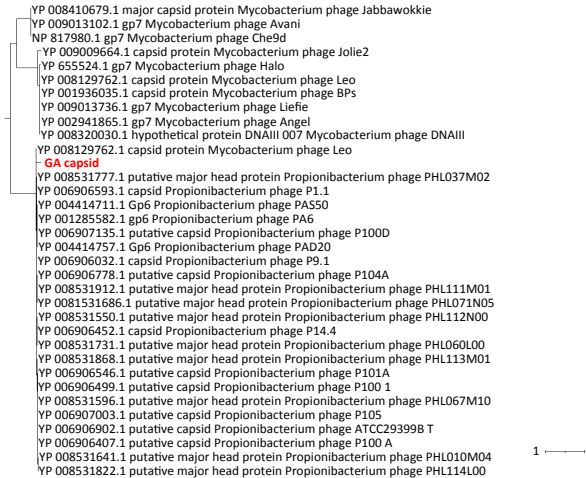

Supplement: 40168_2015_129_MOESM3_ESM.pdf [file 40168_2015_129_MOESM3_ESM.pdf]
