# Supplementary material for: A viability-linked metagenomic analysis of cleanroom environments: eukarya, prokaryotes, and viruses
Source: PubMed Central journal article supplement (PMC4672508; doi:10.1186/s40168-015-0129-y), 2015-12-08
Supplement: 40168_2015_129_MOESM5_ESM.pdf [file 40168_2015_129_MOESM5_ESM.pdf]

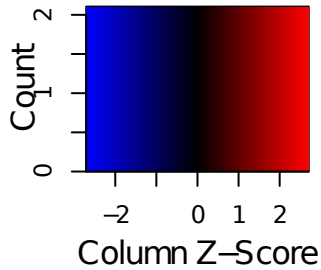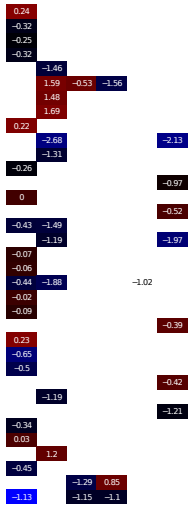

Metabolism;Carbohydrate Metabolism;Glycolysis / Gluconeogenesis;K01810 – glucose-6-phosphate isomerase [EC:5.3.3.9]  
 Metabolism;Carbohydrate Metabolism;Glycolysis / Gluconeogenesis;K01834 – 2,3-bisphosphoglycerate-dependent phosphoglycerate mutase [EC:5.4.2.11]  
 Metabolism;Carbohydrate Metabolism;Galactose metabolism;K00649 – galactokinase [EC:2.7.1.6]  
 Metabolism;Carbohydrate Metabolism;Pyruvate metabolism;K11262 – acetyl-CoA carboxylase/ biotin carboxylase [EC:6.4.1.2 6.3.4.14]  
 Metabolism;Energy Metabolism;Oxidative phosphorylation;K00329 – NADH dehydrogenase [EC:1.6.5.3]  
 Metabolism;Energy Metabolism;Oxidative phosphorylation;K00412 – ubiquinol-cytochrome c reductase-cytochrome b subunit  
 Metabolism;Energy Metabolism;Oxidative phosphorylation;K02262 – cytochrome c oxidase subunit 3  
 Metabolism;Energy Metabolism;Oxidative phosphorylation;K02128 – F-type H<sup>+</sup>-transporting ATPase subunit c [EC:3.6.3.14]  
 Metabolism;Energy Metabolism;Nitrogen metabolism;K00264 – glutamate synthase (NADPH/NADH) [EC:1.4.1.13 1.4.1.14]  
 Metabolism;Lipid Metabolism;Glycerolipid metabolism;K00679 – phospholipid:diacylglycerol acyltransferase [EC:2.3.1.158]  
 Metabolism;Amino Acid Metabolism;Lysine degradation;K11433 – histone-lysine N-methyltransferase SETMAR [EC:2.1.1.43]  
 Metabolism;Amino Acid Metabolism;Lysine degradation;K09188 – histone-lysine N-methyltransferase NLL3 [EC:2.1.1.43]  
 Metabolism;Metabolism of Other Amino Acids;Selenocompound metabolism;K0374 – methionyl-RNA synthetase [EC:6.1.1.10]  
 Metabolism;Metabolism of Other Amino Acids;Glutathione metabolism;K11204 – glutamate-cysteine ligase catalytic subunit [EC:6.3.2.2]  
 Genetic Information Processing;Transcription;Basal transcription factors;K03128 – transcription initiation factor TFIIID subunit 2  
 Genetic Information Processing;Transcription;5p spliceosome;K12822 – RNA-binding protein 25  
 Genetic Information Processing;Transcription;5p spliceosome;K11984 – U4/U6.U5 tri-sRNA NP-associated protein 1  
 Genetic Information Processing;Transcription;5p spliceosome;K12850 – pre-mRNA-splicing factor 3B8  
 Genetic Information Processing;Transcription;5p spliceosome;K12858 – ATP-dependent RNA helicase DDX23/PRP28 [EC:3.6.4.13]  
 Genetic Information Processing;Transcription;5p spliceosome;K12879 – THO complex subunit 2  
 Genetic Information Processing;Transcription;5p spliceosome;K12741 – heterogeneous nuclear ribonucleoprotein A1/A3  
 Genetic Information Processing;Translation;Ribosome;K02976 – small subunit ribosomal protein S26  
 Genetic Information Processing;Translation;Ribosome;K02930 – large subunit ribosomal protein L4e  
 Genetic Information Processing;Translation;Ribosome;K02936 – large subunit ribosomal protein L7Ac  
 Genetic Information Processing;Translation;Ribosome;K02940 – large subunit ribosomal protein L9e  
 Genetic Information Processing;Translation;Ribosome;K02877 – large subunit ribosomal protein L15e  
 Genetic Information Processing;Translation;Ribosome;K02891 – large subunit ribosomal protein L22e  
 Genetic Information Processing;Translation;RNA transport;K03254 – translation initiation factor 3 subunit A  
 Genetic Information Processing;Folding, Sorting and Degradation;Ubiquitin mediated proteolysis;K03350 – anaphase-promoting complex subunit 3  
 Genetic Information Processing;Folding, Sorting and Degradation;RNA degradation;K12580 – CR4-NOT transcription complex subunit 3  
 Genetic Information Processing;Folding, Sorting and Degradation;RNA degradation;K12571 – PAB-dependent poly(A)-specific ribonuclease subunit 2 [EC:3.1.13.4]  
 Environmental Information Processing;Membrane Transport;ABC transporters;K05659 – ATP-binding cassette, subfamily B (MDR/TAP), member 1  
 Cellular Processes;Transport and Catabolism;Endocytosis;K12388 – ESCRT-II complex subunit VPS22  
 Cellular Processes;Cell Growth and Death;Cell cycle;K06628 – cell division control protein 45  
 Cellular Processes;Cell Communication;Tight junctions;K10352 – myosin heavy chain

KOS

PMA vs. nonPMA (p, T-test)  
 SAF vs. GA (Welch-test)  
 PMA vs. nonPMA (p, T-test)  
 SAF vs. GA (Welch-test)  
 nonPMA vs. GA (Welch-test)

Comparison
