# Supplementary material for: A viability-linked metagenomic analysis of cleanroom environments: eukarya, prokaryotes, and viruses
Source: PubMed Central journal article supplement (PMC4672508; doi:10.1186/s40168-015-0129-y), 2015-12-08

### All samples (n=12)

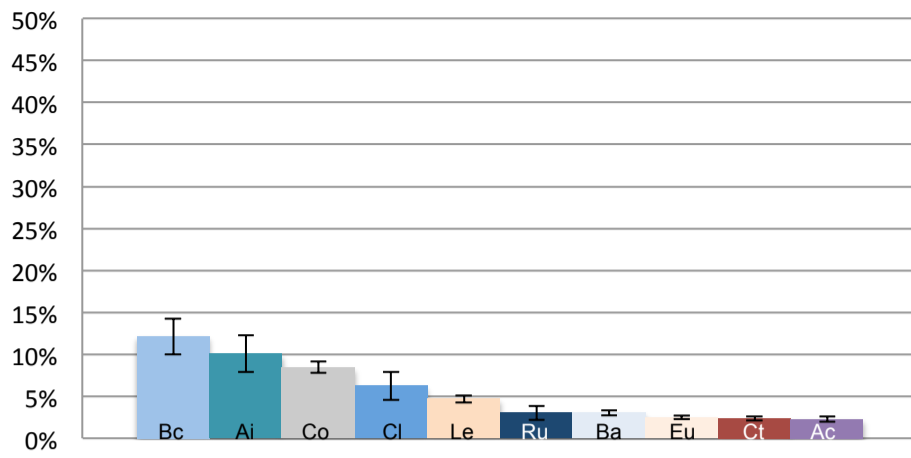

| cellular organisms              | (Co) | Bacteria                   | (Ba) |
|---------------------------------|------|----------------------------|------|
| Eukaryota                       | (Eu) | Proteobacteria (Bac)       | (Pr) |
| Acanthamoeba (Euk, Amoebozoa)   | (Ac) | Gamma proteobacteria (Bac) | (Ga) |
| Leotiomyceta (Euk, Fungi)       | (Le) | Enterobacteriaceae (Bac)   | (En) |
| Exophiala (Euk, Fungi)          | (Ex) | Diploricetisia (Bac)       | (Di) |
| Mycosphaerella (Euk, Fungi)     | (My) | Rickettsiella (Bac)        | (Ri) |
| Claviceps (Euk, Fungi)          | (Ca) | Acinetobacter (Bac)        | (Ai) |
| Boreoeutheria (Euk, Fungi)      | (Bo) | Pseudomonas (Bac)          | (Ps) |
| Simiiformes (Euk, Primates)     | (Si) | Alphaproteobacteria (Bac)  | (Al) |
| Catarrhini (Euk, Primates)      | (Ct) | Bacillus (Bac)             | (Bc) |
| Homo (Euk, Primates)            | (Ho) | Clostridiales (Bac)        | (Cl) |
| unclassified viruses            | (Uv) | Ruminiclostridium (Bac)    | (Ru) |
| unclassified Circoviridae (Vir) | (Uc) | Staphylococcus (Bac)       | (St) |
|                                 |      | Gardnerella (Bac)          | (Gr) |
|                                 |      | Propionibacterium (Bac)    | (Pp) |

### PMA: SAF + GA (n=6)

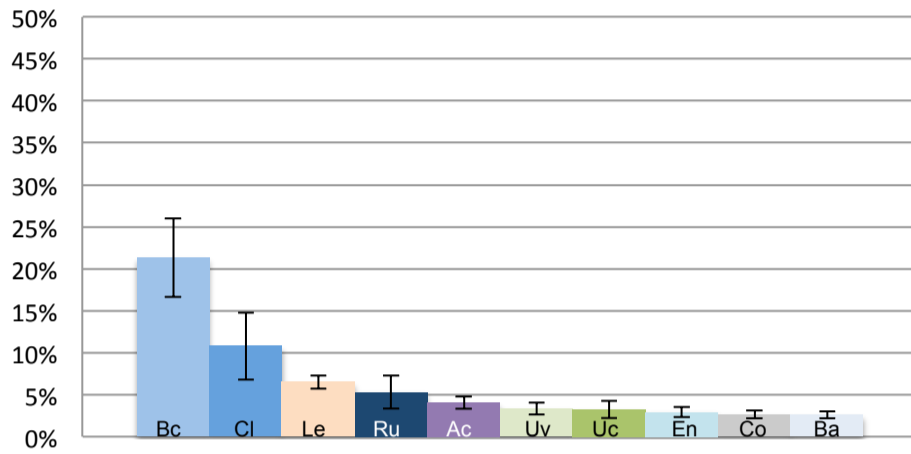

### nonPMA: SAF + GA (n=6)

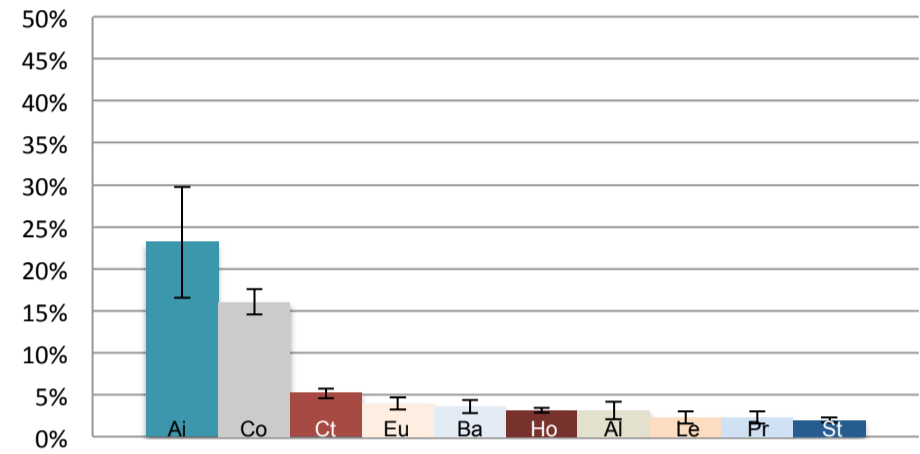

### SAF: PMA + nonPMA (n=6)

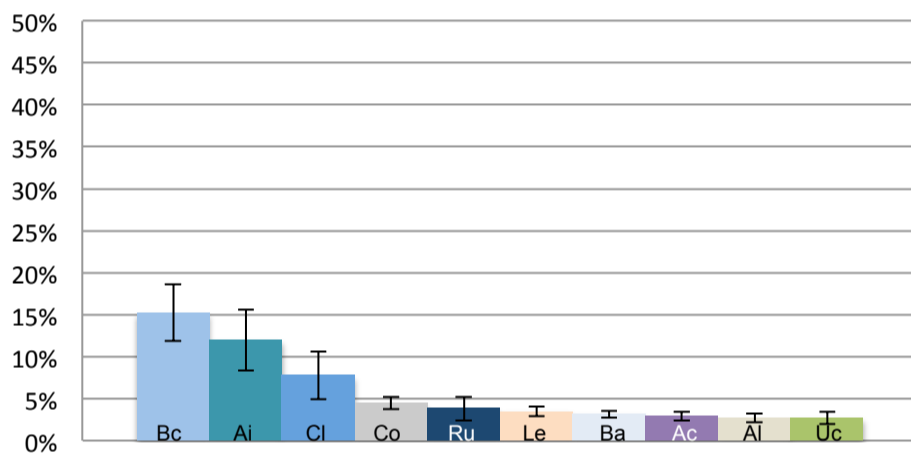

### GA: PMA + nonPMA (n=6)

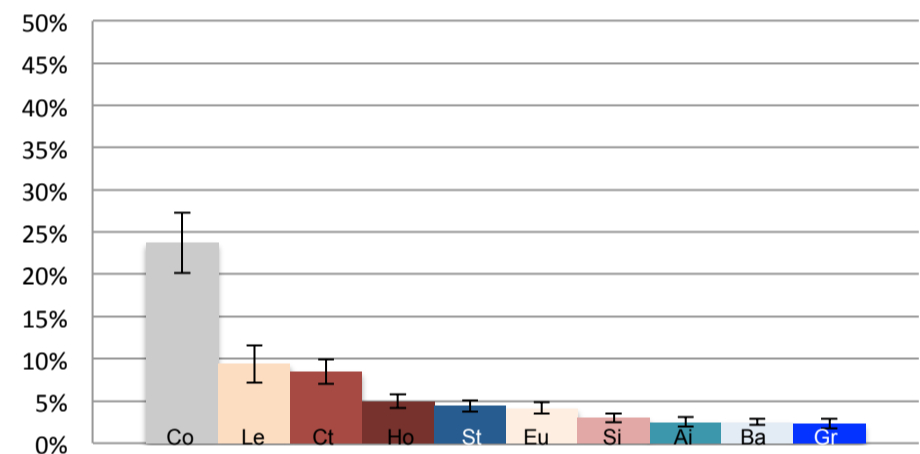

### SAF\_nonPMA (n=3)

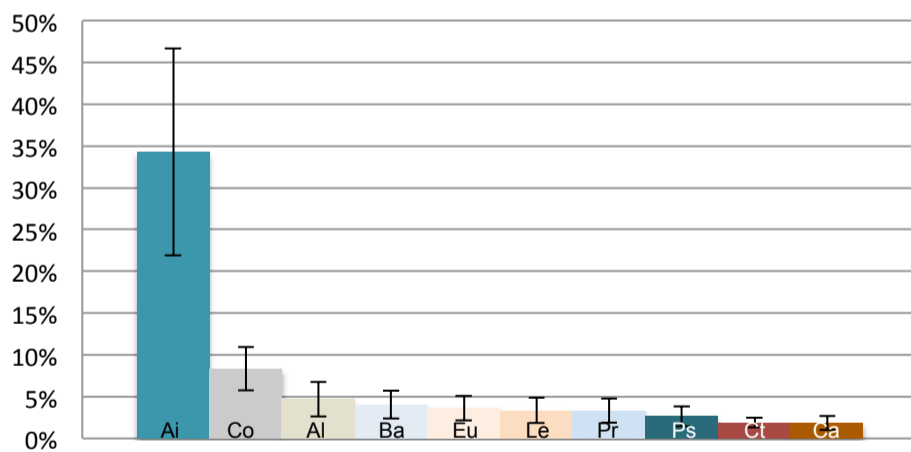

### GA\_nonPMA (n=3)

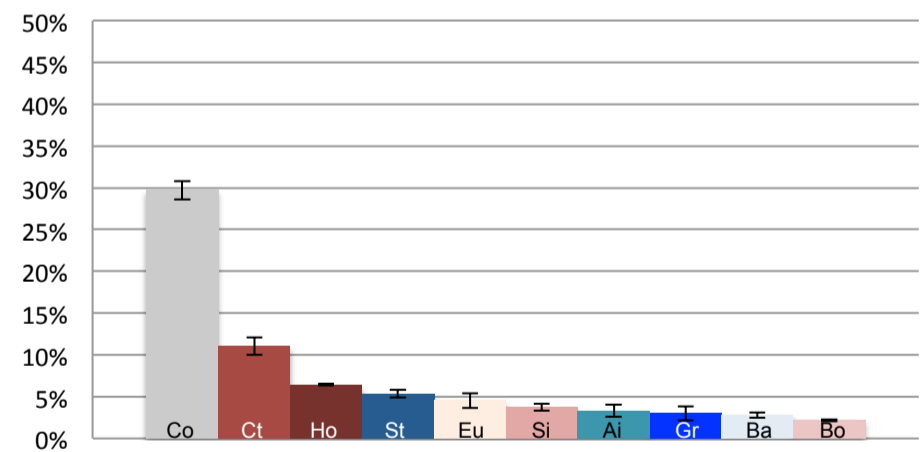

Supplement: 40168_2015_129_MOESM8_ESM.pdf [file 40168_2015_129_MOESM8_ESM.pdf]
