# Supplementary material for: A viability-linked metagenomic analysis of cleanroom environments: eukarya, prokaryotes, and viruses
Source: Microbiome. 2015 Dec 8;3:62. doi: 10.1186/s40168-015-0129-y (PMC4672508; doi:10.1186/s40168-015-0129-y)
Supplement: Additional file 4: Figure S2. — A PDF showing a heatmap of relative abundances. Heatmap of relative abundances of key enzymes, with respect to planetary protection, among all functional annotations. Blue: minimum values; Red: maximum values. (PDF 50 kb) [file 40168_2015_129_MOESM4_ESM.pdf]

|                          |                                                                                | GA_A    | GA_B    | GA_C    | SAF_A   | SAF_B   | SAF_C   | GA_A_PMA | GA_B_PMA | GA_C_PMA | SAF_A_PMA | SAF_B_PMA | SAF_C_PMA |
|--------------------------|--------------------------------------------------------------------------------|---------|---------|---------|---------|---------|---------|----------|----------|----------|-----------|-----------|-----------|
| Heat shock proteins      | heat shock 70kDa protein 1/8                                                   | 7.2E-05 | 0.0E+00 | 0.0E+00 | 4.1E-05 | 0.0E+00 | 0.0E+00 | 0.0E+00  | 0.0E+00  | 0.0E+00  | 0.0E+00   | 0.0E+00   | 0.0E+00   |
|                          | HSFF; heat shock transcription factor, other eukaryote                         | 0.0E+00  | 0.0E+00  | 0.0E+00  | 0.0E+00   | 1.3E-05   | 0.0E+00   |
|                          | heat shock 70kDa protein 4                                                     | 0.0E+00 | 0.0E+00 | 0.0E+00 | 8.9E-05 | 0.0E+00 | 0.0E+00 | 0.0E+00  | 0.0E+00  | 0.0E+00  | 0.0E+00   | 0.0E+00   | 0.0E+00   |
|                          | BIP; heat shock 70kDa protein 5                                                | 0.0E+00  | 0.0E+00  | 0.0E+00  | 0.0E+00   | 0.0E+00   | 2.7E-06   |
| DNA repair               | DNA-3-methyladenine glycosylase I [EC:3.2.2.20]                                | 0.0E+00 | 0.0E+00 | 0.0E+00 | 4.1E-06 | 0.0E+00 | 0.0E+00 | 0.0E+00  | 0.0E+00  | 0.0E+00  | 0.0E+00   | 0.0E+00   | 0.0E+00   |
|                          | DNA glycosylase [EC:3.2.2.-]                                                   | 0.0E+00 | 0.0E+00 | 0.0E+00 | 1.2E-05 | 0.0E+00 | 3.1E-04 | 0.0E+00  | 0.0E+00  | 0.0E+00  | 0.0E+00   | 0.0E+00   | 0.0E+00   |
|                          | mutY; A/G-specific adenine glycosylase [EC:3.2.2.-]                            | 0.0E+00 | 0.0E+00 | 0.0E+00 | 0.0E+00 | 3.6E-03 | 0.0E+00 | 0.0E+00  | 0.0E+00  | 0.0E+00  | 0.0E+00   | 0.0E+00   | 0.0E+00   |
|                          | UNG, UDG; uracil-DNA glycosylase [EC:3.2.2.27]                                 | 7.2E-05 | 0.0E+00 | 0.0E+00 | 0.0E+00 | 0.0E+00 | 0.0E+00 | 0.0E+00  | 0.0E+00  | 0.0E+00  | 0.0E+00   | 5.4E-05   | 0.0E+00   |
|                          | TDG/mug DNA glycosylase family protein [EC:3.2.2.-]                            | 0.0E+00 | 0.0E+00 | 0.0E+00 | 4.1E-06 | 0.0E+00 | 0.0E+00 | 0.0E+00  | 0.0E+00  | 0.0E+00  | 0.0E+00   | 0.0E+00   | 0.0E+00   |
|                          | OGG1; N-glycosylase/DNA lyase [EC:3.2.2.- 4.2.99.18]                           | 0.0E+00 | 0.0E+00 | 0.0E+00 | 4.1E-06 | 0.0E+00 | 1.0E-04 | 0.0E+00  | 0.0E+00  | 1.5E-05  | 0.0E+00   | 0.0E+00   | 0.0E+00   |
|                          | mutM, fpg; formamidopyrimidine-DNA glycosylase [EC:3.2.2.23 4.2.99.18]         | 0.0E+00 | 1.5E-04 | 0.0E+00 | 2.8E-05 | 0.0E+00 | 0.0E+00 | 0.0E+00  | 0.0E+00  | 0.0E+00  | 0.0E+00   | 0.0E+00   | 0.0E+00   |
|                          | XPA; DNA-repair protein complementing XP-A cells                               | 0.0E+00  | 5.2E-05  | 0.0E+00  | 0.0E+00   | 0.0E+00   | 8.1E-06   |
|                          | DNA repair protein REV1 [EC:2.7.7.-]                                           | 7.2E-05 | 2.4E-03 | 0.0E+00 | 3.7E-05 | 3.6E-03 | 1.3E-03 | 1.3E-04  | 0.0E+00  | 7.7E-06  | 0.0E+00   | 1.0E-04   | 1.9E-05   |
|                          | DNA mismatch repair protein MutS                                               | 0.0E+00 | 0.0E+00 | 0.0E+00 | 4.1E-06 | 0.0E+00 | 0.0E+00 | 0.0E+00  | 0.0E+00  | 0.0E+00  | 0.0E+00   | 0.0E+00   | 0.0E+00   |
|                          | DNA mismatch repair protein MLH1                                               | 0.0E+00 | 0.0E+00 | 0.0E+00 | 8.1E-06 | 0.0E+00 | 0.0E+00 | 0.0E+00  | 0.0E+00  | 0.0E+00  | 0.0E+00   | 3.6E-05   | 0.0E+00   |
|                          | DNA mismatch repair protein MSH2                                               | 0.0E+00 | 0.0E+00 | 0.0E+00 | 5.7E-05 | 0.0E+00 | 0.0E+00 | 0.0E+00  | 0.0E+00  | 0.0E+00  | 0.0E+00   | 0.0E+00   | 0.0E+00   |
|                          | DNA mismatch repair protein MSH3                                               | 0.0E+00 | 0.0E+00 | 0.0E+00 | 2.4E-05 | 0.0E+00 | 1.0E-04 | 0.0E+00  | 0.0E+00  | 0.0E+00  | 0.0E+00   | 0.0E+00   | 0.0E+00   |
|                          | DNA mismatch repair protein MSH6                                               | 0.0E+00 | 0.0E+00 | 0.0E+00 | 4.1E-06 | 0.0E+00 | 0.0E+00 | 0.0E+00  | 0.0E+00  | 0.0E+00  | 0.0E+00   | 0.0E+00   | 0.0E+00   |
|                          | DNA excision repair protein ERCC-1                                             | 0.0E+00 | 0.0E+00 | 0.0E+00 | 0.0E+00 | 0.0E+00 | 1.0E-04 | 0.0E+00  | 0.0E+00  | 0.0E+00  | 0.0E+00   | 0.0E+00   | 0.0E+00   |
|                          | XPB; DNA excision repair protein ERCC-3 [EC:3.6.4.12]                          | 0.0E+00 | 0.0E+00 | 1.5E-03 | 1.2E-05 | 0.0E+00 | 0.0E+00 | 0.0E+00  | 0.0E+00  | 0.0E+00  | 0.0E+00   | 0.0E+00   | 0.0E+00   |
|                          | XPG, RAD2; DNA excision repair protein ERCC-5                                  | 0.0E+00 | 0.0E+00 | 0.0E+00 | 3.8E-04 | 0.0E+00 | 0.0E+00 | 0.0E+00  | 0.0E+00  | 0.0E+00  | 0.0E+00   | 0.0E+00   | 0.0E+00   |
|                          | CSB, RAD26; DNA excision repair protein ERCC-6                                 | 0.0E+00 | 1.5E-04 | 0.0E+00 | 0.0E+00 | 0.0E+00 | 0.0E+00 | 0.0E+00  | 0.0E+00  | 0.0E+00  | 0.0E+00   | 0.0E+00   | 0.0E+00   |
| Homologous recombination | DNA repair and recombination protein RAD54 and RAD54-like protein [EC:3.6.4.-] | 0.0E+00 | 0.0E+00 | 0.0E+00 | 3.3E-04 | 0.0E+00 | 0.0E+00 | 0.0E+00  | 0.0E+00  | 0.0E+00  | 0.0E+00   | 2.6E-06   | 0.0E+00   |
|                          | DNA repair and recombination protein RAD54B [EC:3.6.4.-]                       | 0.0E+00 | 0.0E+00 | 0.0E+00 | 3.4E-04 | 0.0E+00 | 0.0E+00 | 0.0E+00  | 0.0E+00  | 0.0E+00  | 0.0E+00   | 0.0E+00   | 0.0E+00   |
|                          | DNA repair protein RAD57                                                       | 7.2E-05 | 0.0E+00 | 0.0E+00 | 0.0E+00 | 0.0E+00 | 0.0E+00 | 0.0E+00  | 0.0E+00  | 0.0E+00  | 0.0E+00   | 0.0E+00   | 0.0E+00   |
|                          | recombination protein RecR                                                     | 0.0E+00 | 0.0E+00 | 0.0E+00 | 4.1E-06 | 0.0E+00 | 0.0E+00 | 0.0E+00  | 0.0E+00  | 0.0E+00  | 0.0E+00   | 0.0E+00   | 0.0E+00   |
|                          | DNA recombination protein RmuC                                                 | 0.0E+00  | 5.2E-05  | 0.0E+00  | 0.0E+00   | 0.0E+00   | 0.0E+00   |
| Carbon fixation          | 3-hydroxyacyl-CoA dehydrogenase [EC:1.1.1.35]                                  | 0.0E+00 | 0.0E+00 | 0.0E+00 | 1.6E-05 | 0.0E+00 | 0.0E+00 | 0.0E+00  | 0.0E+00  | 0.0E+00  | 0.0E+00   | 0.0E+00   | 0.0E+00   |
|                          | Methylenetetrahydrofolate reductase (NADPH) [EC:1.5.1.20]                      | 0.0E+00  | 0.0E+00  | 7.7E-06  | 0.0E+00   | 0.0E+00   | 0.0E+00   |
| Nitrogen metabolism      | Cyanate lyase [EC:4.2.1.104]                                                   | 0.0E+00  | 0.0E+00  | 7.7E-06  | 0.0E+00   | 0.0E+00   | 0.0E+00   |
|                          | Carbonic anhydrase [EC:4.2.1.1]                                                | 0.0E+00 | 0.0E+00 | 0.0E+00 | 1.6E-05 | 0.0E+00 | 0.0E+00 | 0.0E+00  | 0.0E+00  | 0.0E+00  | 0.0E+00   | 0.0E+00   | 0.0E+00   |
|                          | Carbonic anhydrase [EC:4.2.1.1]                                                | 0.0E+00 | 0.0E+00 | 1.5E-04 | 4.1E-06 | 0.0E+00 | 0.0E+00 | 0.0E+00  | 0.0E+00  | 0.0E+00  | 0.0E+00   | 0.0E+00   | 0.0E+00   |
|                          | Carbonic anhydrase [EC:4.2.1.1]                                                | 0.0E+00 | 0.0E+00 | 0.0E+00 | 0.0E+00 | 0.0E+00 | 3.1E-04 | 0.0E+00  | 0.0E+00  | 0.0E+00  | 0.0E+00   | 0.0E+00   | 0.0E+00   |
|                          | Aminomethyltransferase [EC:2.1.2.10]                                           | 7.2E-05 | 0.0E+00 | 0.0E+00 | 1.2E-04 | 0.0E+00 | 0.0E+00 | 0.0E+00  | 0.0E+00  | 0.0E+00  | 0.0E+00   | 0.0E+00   | 0.0E+00   |
|                          | L-asparaginase [EC:3.5.1.1]                                                    | 0.0E+00 | 0.0E+00 | 0.0E+00 | 4.1E-06 | 0.0E+00 | 0.0E+00 | 0.0E+00  | 0.0E+00  | 0.0E+00  | 0.0E+00   | 0.0E+00   | 0.0E+00   |
|                          | Nitronate monooxygenase [EC:1.13.12.16]                                        | 7.2E-05 | 0.0E+00 | 0.0E+00 | 0.0E+00 | 0.0E+00 | 0.0E+00 | 0.0E+00  | 0.0E+00  | 0.0E+00  | 0.0E+00   | 0.0E+00   | 0.0E+00   |
|                          | Nitrate reductase (NADPH) [EC:1.7.1.3]                                         | 0.0E+00 | 0.0E+00 | 0.0E+00 | 1.6E-05 | 0.0E+00 | 0.0E+00 | 0.0E+00  | 0.0E+00  | 0.0E+00  | 0.0E+00   | 0.0E+00   | 0.0E+00   |
|                          | Nitrite reductase (NAD(P)H) large subunit [EC:1.7.1.4]                         | 0.0E+00 | 0.0E+00 | 0.0E+00 | 4.1E-06 | 0.0E+00 | 0.0E+00 | 0.0E+00  | 0.0E+00  | 0.0E+00  | 0.0E+00   | 0.0E+00   | 0.0E+00   |
|                          | Glutamate dehydrogenase [EC:1.4.1.2]                                           | 0.0E+00 | 0.0E+00 | 0.0E+00 | 2.6E-04 | 0.0E+00 | 0.0E+00 | 0.0E+00  | 0.0E+00  | 0.0E+00  | 0.0E+00   | 0.0E+00   | 0.0E+00   |
|                          | Glutamate dehydrogenase (NAD(P)+) [EC:1.4.1.3]                                 | 0.0E+00 | 0.0E+00 | 0.0E+00 | 2.0E-05 | 0.0E+00 | 0.0E+00 | 0.0E+00  | 0.0E+00  | 0.0E+00  | 0.0E+00   | 0.0E+00   | 0.0E+00   |
|                          | Glutamate dehydrogenase (NADP+) [EC:1.4.1.4]                                   | 0.0E+00 | 0.0E+00 | 0.0E+00 | 4.1E-06 | 0.0E+00 | 0.0E+00 | 0.0E+00  | 0.0E+00  | 0.0E+00  | 0.0E+00   | 0.0E+00   | 0.0E+00   |
|                          | Glutaminase [EC:3.5.1.2]                                                       | 7.2E-05 | 0.0E+00 | 0.0E+00 | 0.0E+00 | 0.0E+00 | 0.0E+00 | 0.0E+00  | 0.0E+00  | 0.0E+00  | 0.0E+00   | 0.0E+00   | 0.0E+00   |
|                          | Glutamate synthase (NADPH/NADH) [EC:1.4.1.13 1.4.1.14]                         | 0.0E+00 | 1.5E-04 | 6.1E-04 | 4.1E-06 | 0.0E+00 | 1.0E-04 | 0.0E+00  | 0.0E+00  | 0.0E+00  | 0.0E+00   | 0.0E+00   | 0.0E+00   |
|                          | Asparagine synthase (glutamine-hydrolysing) [EC:6.3.5.4]                       | 0.0E+00 | 0.0E+00 | 0.0E+00 | 2.7E-04 | 0.0E+00 | 0.0E+00 | 0.0E+00  | 0.0E+00  | 0.0E+00  | 0.0E+00   | 0.0E+00   | 0.0E+00   |
|                          | Nitrilase [EC:3.5.5.1]                                                         | 0.0E+00 | 0.0E+00 | 0.0E+00 | 3.7E-05 | 0.0E+00 | 5.1E-04 | 0.0E+00  | 0.0E+00  | 0.0E+00  | 0.0E+00   | 0.0E+00   | 0.0E+00   |
|                          | Electron transfer flavoprotein beta subunit                                    | 0.0E+00 | 1.5E-04 | 0.0E+00 | 0.0E+00 | 0.0E+00 | 0.0E+00 | 0.0E+00  | 0.0E+00  | 0.0E+00  | 0.0E+00   | 2.6E-06   | 0.0E+00   |
| Sulfur metabolism        | 3'-phosphoadenosine 5'-phosphosulfate synthase [EC:2.7.7.4 2.7.1.25]           | 0.0E+00 | 0.0E+00 | 0.0E+00 | 4.1E-06 | 0.0E+00 | 0.0E+00 | 0.0E+00  | 0.0E+00  | 0.0E+00  | 0.0E+00   | 0.0E+00   | 0.0E+00   |
|                          | Adenylylsulfate kinase [EC:2.7.1.25]                                           | 0.0E+00 | 0.0E+00 | 1.4E-03 | 3.8E-04 | 0.0E+00 | 0.0E+00 | 0.0E+00  | 0.0E+00  | 0.0E+00  | 0.0E+00   | 0.0E+00   | 0.0E+00   |
|                          | Sulfate adenylyltransferase [EC:2.7.7.4]                                       | 0.0E+00 | 0.0E+00 | 0.0E+00 | 2.4E-05 | 0.0E+00 | 0.0E+00 | 0.0E+00  | 0.0E+00  | 0.0E+00  | 0.0E+00   | 0.0E+00   | 0.0E+00   |
|                          | Phosphoadenosine phosphosulfate reductase [EC:1.8.4.8]                         | 0.0E+00 | 0.0E+00 | 0.0E+00 | 5.3E-05 | 0.0E+00 | 0.0E+00 | 0.0E+00  | 0.0E+00  | 0.0E+00  | 0.0E+00   | 0.0E+00   | 0.0E+00   |
|                          | Sulfite reductase (NADPH) flavoprotein alpha-component [EC:1.8.1.2]            | 0.0E+00  | 0.0E+00  | 2.1E-04  | 0.0E+00   | 0.0E+00   | 0.0E+00   |
|                          | Cystathionine beta-lyase [EC:4.4.1.8]                                          | 0.0E+00 | 0.0E+00 | 0.0E+00 | 6.5E-05 | 0.0E+00 | 0.0E+00 | 0.0E+00  | 0.0E+00  | 0.0E+00  | 0.0E+00   | 0.0E+00   | 0.0E+00   |
|                          | Cystathionine gamma-synthase [EC:2.5.1.48]                                     | 0.0E+00 | 0.0E+00 | 0.0E+00 | 1.2E-05 | 0.0E+00 | 0.0E+00 | 0.0E+00  | 0.0E+00  | 0.0E+00  | 0.0E+00   | 0.0E+00   | 0.0E+00   |
|                          | Homoserine O-succinyltransferase [EC:2.3.1.46]                                 | 0.0E+00 | 0.0E+00 | 0.0E+00 | 1.6E-05 | 0.0E+00 | 0.0E+00 | 0.0E+00  | 0.0E+00  | 0.0E+00  | 0.0E+00   | 0.0E+00   | 0.0E+00   |
|                          | Homoserine O-acetyltransferase [EC:2.3.1.31]                                   | 1.4E-04 | 2.3E-03 | 0.0E+00 | 2.0E-05 | 0.0E+00 | 0.0E+00 | 0.0E+00  | 0.0E+00  | 0.0E+00  | 0.0E+00   | 0.0E+00   | 0.0E+00   |
|                          | Cysteine synthase A [EC:2.5.1.47]                                              | 0.0E+00 | 0.0E+00 | 4.6E-04 | 0.0E+00 | 0.0E+00 | 1.0E-04 | 0.0E+00  | 0.0E+00  | 0.0E+00  | 0.0E+00   | 0.0E+00   | 0.0E+00   |
